# Supplementary material for: Reduce the Risk of Microbial activity and Cytotoxicity by Adansonia digitata pulp extract, grown under the Semi-Arid Conditions of Sudan
Source: Research Square preprint supplement (doi:10.21203/rs.3.rs-7397839/v1), 2025-08-21
Supplement: Supplementary file 1 [file 0a76ac8d7d4c8ccfe7230837.docx]

**Additional material**


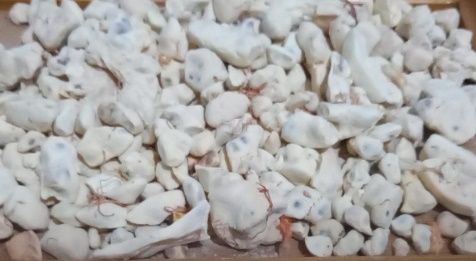


***Adansonia* *digitata* pulp collected from west Sudan.**


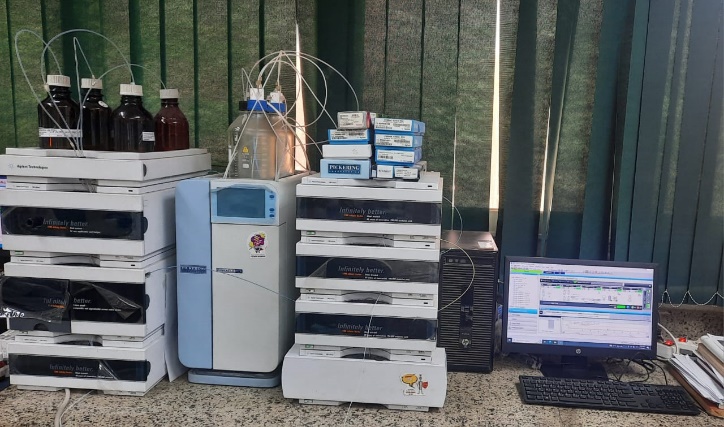


**High Performance Liquid Chromatography device (used in this study)**


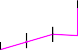

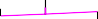


mAU

60

50

40

30

20

10

0

-10

2.5

5

7.5

10

12.5

15

17.5

20

22.5 min

3.572 - Gallic acid

4. 4.183 - Chlorogenic acid

423 - Catechin

5.413 - Methyl gallate 5.823 - Coffeic acid

6.313 - Syringic acid 6.722 - Rutin

7.102 - Ellagic acid

8.542 - Coumaric acid

8.967 - Vanillin

9.574 - Ferulic acid

10.194 - Naringenin

11.610 - Rosmarinic acid

19.112 - Cinnamic acid

20.502 - Kaempferol

21.095 - Hesperetin

Area: 248.328

**Phenolic compounds of *Adansonia* *digitata* pulp extract identified by HPLC.**


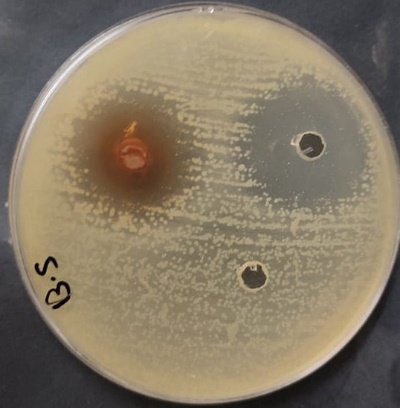


**Inhibitions zones (in mm) byAdansonia *digitata* ethanoic pulp extracts against *Bacillus* *subtilis*.**

**
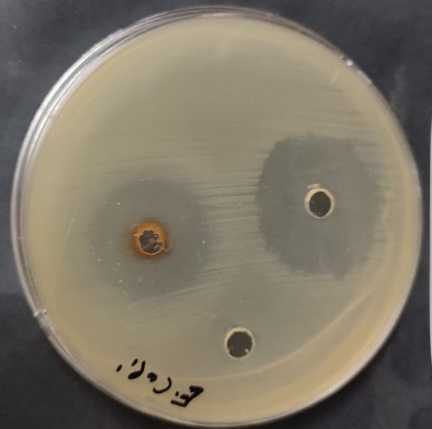
**

**Inhibitions zones (in mm) byAdansonia *digitata* ethanoic pulp extracts against *Escherichia* *coli*.**


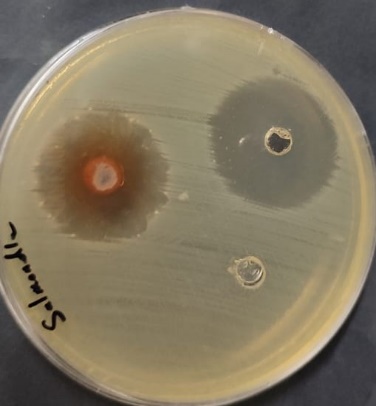

**Inhibitions zones (in mm) by *Adansonia* *digitata* ethanoic pulp extracts against *Salmonella* *typhi*.**


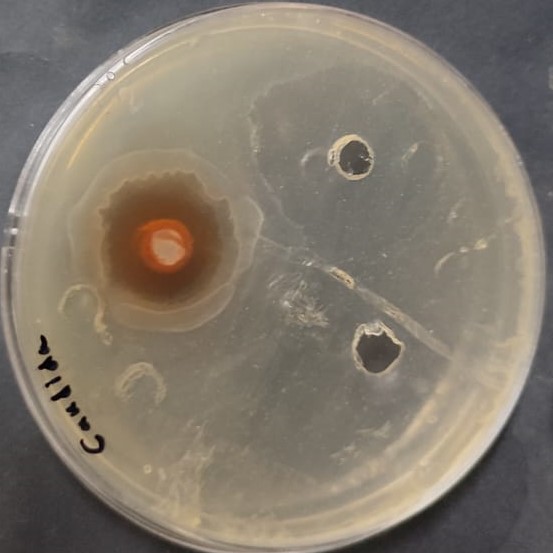


**Inhibitions zones (in mm) by *Adansonia* *digitata* ethanoic pulp extracts against fungi *Candida albicans.***


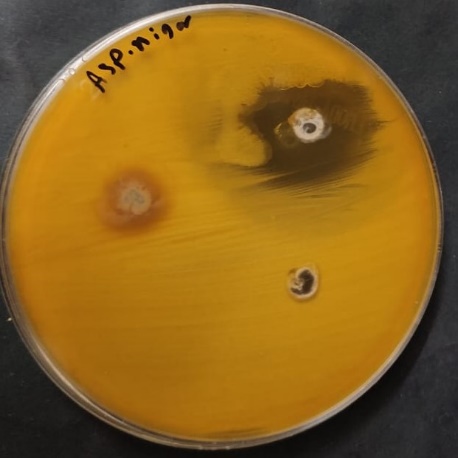


**Inhibitions zones (in mm) by *Adansonia* *digitata* ethanoic pulp extracts against fungi *Aspergillus* *niger***.

| **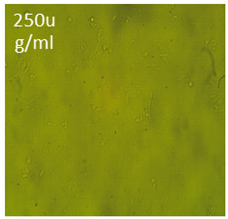** | **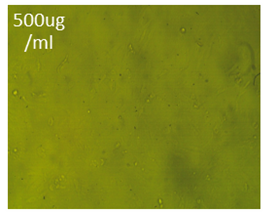** | **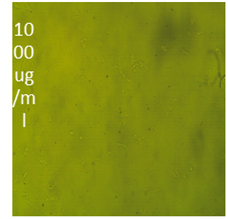** | 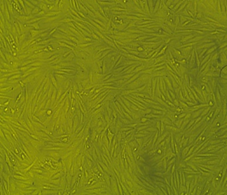 |
| --- | --- | --- | --- |
| **at concentration 250ug/ml** | **at concentration 500ug/ml** | **at concentration 1000ug/ml** | **Hela cell Control)** |

| **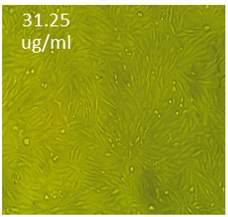** | **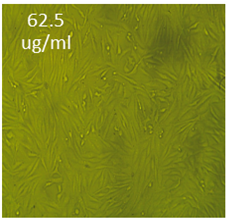** | **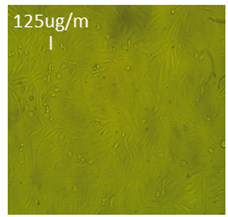** |
| --- | --- | --- |
| **at concentration 31.25ug/ml** | **at concentration 62.5ug/ml** | **at concentration 125ug/ml** |

**Effect of *Adansonia* *digitata* pulp extracts against Hela cell at different concentration.**

| **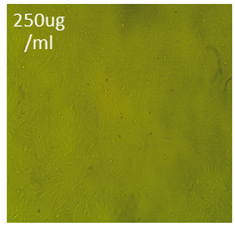** | **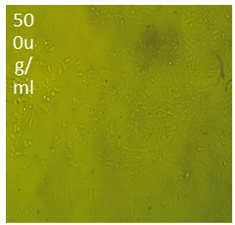** | **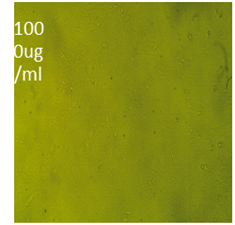** | 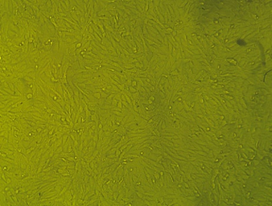 |
| --- | --- | --- | --- |
| **at concentration 250ug/ml** | **at concentration 500ug/ml** | **at concentration 1000ug/ml** | **HepG2 cell Control)** |

| **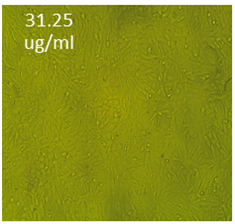** | **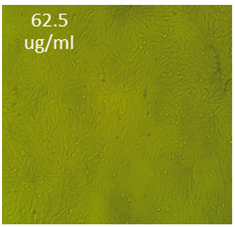** | 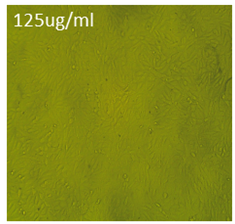 |
| --- | --- | --- |
| **at concentration 31.25ug/ml** | **at concentration 62.5ug/ml** | **at concentration 125ug/ml** |

**Effect of *Adansonia* *digitata* pulp extracts against HepG2 cell at different concentration.**

| **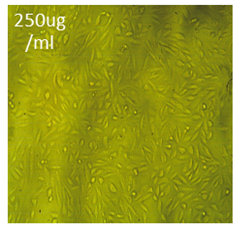** | **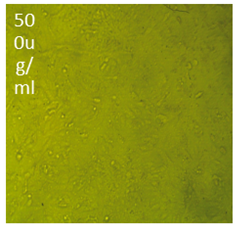** | **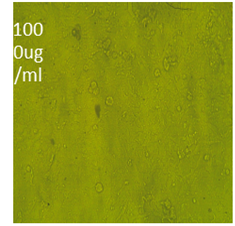** | 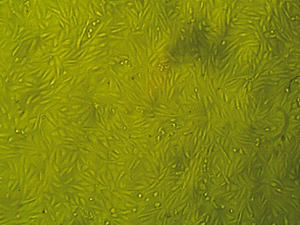 |
| --- | --- | --- | --- |
| **Figure 8.4.at concentration 250ug/ml** | **at concentration 500ug/ml** | **at concentration 1000ug/ml** | **A549 cell Control)** |

| **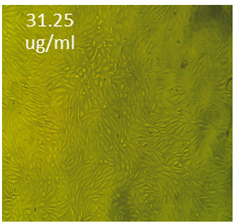** | **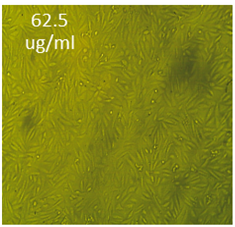** | **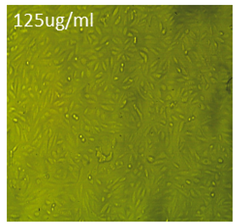** |
| --- | --- | --- |
| **. at concentration 31.25ug/ml** | **at concentration 62.5ug/ml** | **at concentration 125ug/ml** |

**Effect of *Adansonia* *digitata* pulp extracts against A549 cell at different concentration**

| **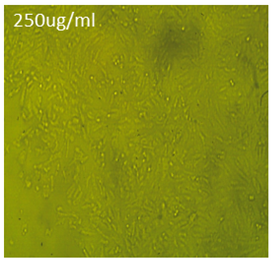** | **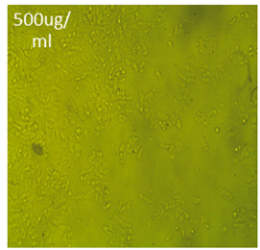** | **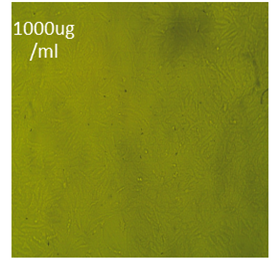** | 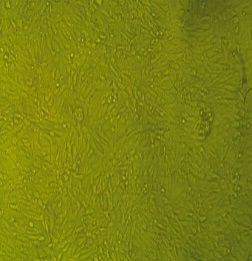 |
| --- | --- | --- | --- |
| **at concentration 250ug/ml** | **at concentration 500ug/ml** | **at concentration 1000ug/ml** | **A431 cell Control)** |

| **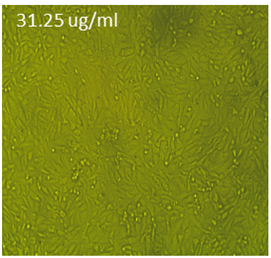** | **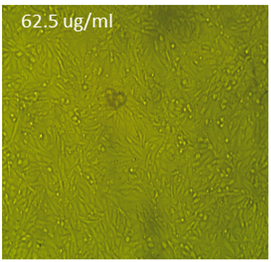** | **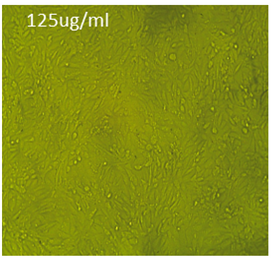** |
| --- | --- | --- |
| **at concentration 31.25ug/ml** | **at concentration 62.5ug/ml** | **at concentration 125ug/ml** |

**Effect of *Adansonia* *digitata* pulp extracts against A431 cell at different concentration.**

| **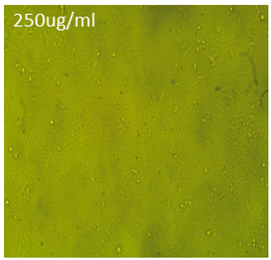** | **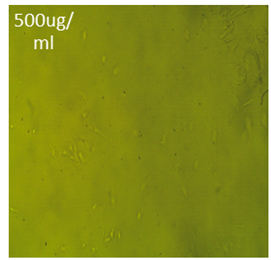** | **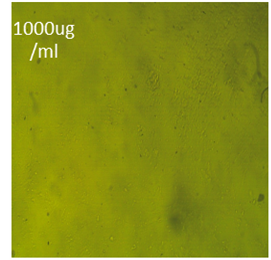** | 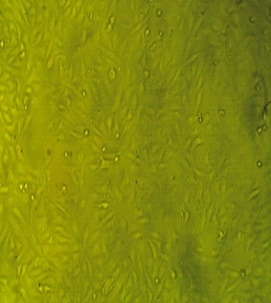 |
| --- | --- | --- | --- |
| **at concentration 250ug/ml** | **at concentration 500ug/ml** | **at concentration 1000ug/ml** | **Pc3 cell Control)** |

| **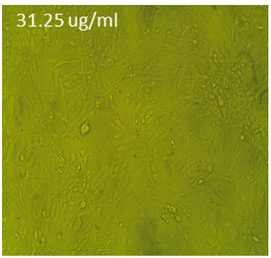** | **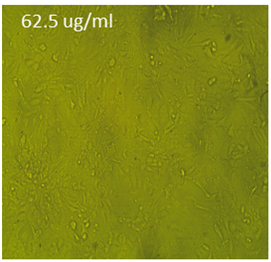** | **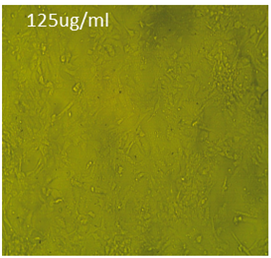** |
| --- | --- | --- |
| **at concentration 31.25ug/ml** | **at concentration 62.5ug/ml** | **at concentration 125ug/ml** |

**Effect of *Adansonia* *digitata* pulp extracts against Pc3 cell at different concentration.**

| **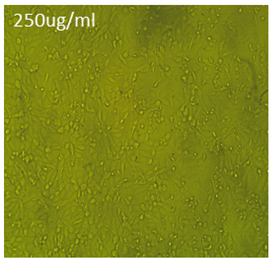** | **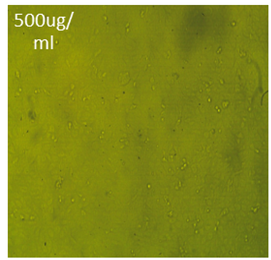** | **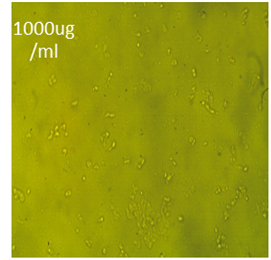** | 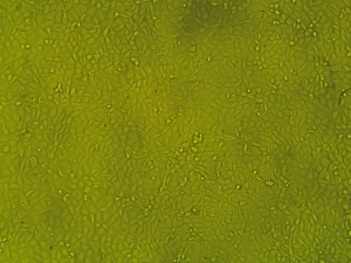 |
| --- | --- | --- | --- |
| **at concentration 250ug/ml** | **at concentration 500ug/ml** | **at concentration 1000ug/ml** | **T47D cell Control)** |

| **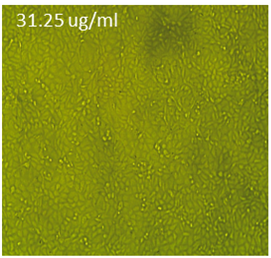** | **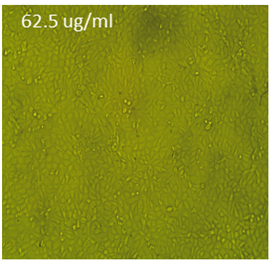** | **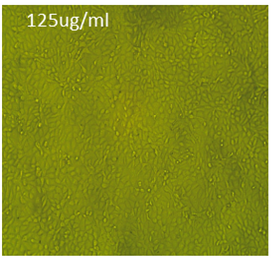** |
| --- | --- | --- |
| **At concentration 31.25ug/ml** | **At concentration 62.5ug/ml** | **at concentration 125ug/ml** |

**Effect of *Adansonia* *digitata* pulp extracts against T47D cell at different concentration.**
